1 Gene Cascade Finder: A tool for identification of gene cascades  
2 and its application in *Caenorhabditis elegans*

3 Short title: GCF for gene cascade identification

4

5 Yusuke Nomoto<sup>1</sup>, Yukihiro Kubota<sup>2</sup>, Kota Kasahara<sup>2</sup>, Aimi Tomita<sup>1</sup>, Takehiro Oshime<sup>1</sup>, Hiroki  
6 Yamashita<sup>1</sup>, Muhamad Fahmi<sup>2</sup>, Masahiro Ito<sup>1,2,\*</sup>

7

8 <sup>1</sup>Advanced Life Sciences Program, Graduate School of Life Sciences, Ritsumeikan University,  
9 Kusatsu, Shiga, Japan

10 <sup>2</sup>Department of Bioinformatics, College of Life Sciences, Ritsumeikan University, Kusatsu, Shiga,  
11 Japan

12

13 \*Corresponding author

14 Email: maito@sk.ritsumei.ac.jp (MI)

15

## 16 **Abstract**

17 Obtaining a comprehensive understanding of the gene regulatory networks, or gene cascades,  
18 involved in cell fate determination and cell lineage segregation in *Caenorhabditis elegans* is a long-  
19 standing challenge. Although RNA-sequencing (RNA-Seq) is a promising technique to resolve these  
20 questions, the bioinformatics tools to identify associated gene cascades from RNA-Seq data remain  
21 inadequate. To overcome these limitations, we developed Gene Cascade Finder (GCF) as a novel  
22 tool for building gene cascades by comparison of mutant and wild-type RNA-Seq data along with  
23 integrated information of protein-protein interactions, expression timing, and domains. Application  
24 of GCF to RNA-Seq data confirmed that SPN-4 and MEX-3 regulate the canonical Wnt pathway  
25 during embryonic development. Moreover, *lin-35*, *hsp-3*, and *gpa-12* were found to be involved in  
26 MEX-1-dependent neurogenesis, and MEX-3 was found to control the gene cascade promoting  
27 neurogenesis through *lin-35* and *apl-1*. Thus, GCF could be a useful tool for building gene cascades  
28 from RNA-Seq data.

29

## 30 **Introduction**

31 Spatially and temporally regulated gene expression is essential to precisely modulate cellular  
32 behaviors during development in multicellular organisms. Elucidating gene cascades during early  
33 embryonic development may improve our understanding of mechanisms of cell fate determination  
34 and lineage segregation [1-3]. The nematode *Caenorhabditis elegans*, a model organism of  
35 development research, comprises 959 cells in adult hermaphrodites with robustness and  
36 reproducibility of the cell lineage [3]. Additionally, over 80% of the *C. elegans* proteome shows  
37 homology with human proteins [4], providing a particularly valuable model organism for studies of  
38 the developmental system.

39 PAR proteins, which are expressed immediately after fertilization, are associated with  
40 formation of the anterior-posterior polarity of P0 cells and control the localization of polarity  
41 mediators such as SPN-4, MEX-1, and MEX-3 in *C. elegans* [5]. Aberrant expression of the genes  
42 encoding these proteins affects cellular and developmental regulation, leading to embryonic lethality  
43 in early embryogenesis [6-9]. Specifically, SPN-4 is localized in all blastomeres at the four-cell stage  
44 and plays essential roles in axial rotation [8, 10-12]; MEX-1 is expressed in the P1 blastomere, and  
45 loss of its function leads to excessive muscle formation [7, 13]; and MEX-3 is expressed in the AB  
46 blastomere, and causes excessive muscle formation and hatching failure in mutants [14-16].  
47 Although polarity mediators regulate protein synthesis by binding to the 3'-untranslated region of the  
48 target mRNA, it is difficult to directly identify their associated gene cascades.

49 Conventional genetic and molecular biological approaches have focused on the target gene to  
50 be identified and have clarified functions and identified related genes, representing a bottom-up  
51 approach. Both functional analysis of individual genes and comprehensive analysis of the genome  
52 are indispensable for identification of gene cascades. After determination of the whole genome  
53 sequence of *C. elegans* in 1998, genome-wide analysis via a top-down approach was made possible

54 [17], representing the beginning of the post-genome sequencing era. Transcriptomics via DNA  
55 microarray analysis [18], proteomics via mass spectrometry analysis [19], and phenomenon analysis  
56 by RNA interference [20] have been extensively reported. Furthermore, several methods for  
57 comprehensive analyses have been developed, including protein-protein interaction analysis using a  
58 yeast two-hybrid system and phage display [21, 22] and multiple mutation analysis using knockdown  
59 mutants. At the same time, the WormBase database was constructed to integrate the vast quantities of  
60 data obtained from these genome-wide analyses [23]. Accordingly, the development of new  
61 technologies and methodologies has enabled the accumulation of detailed genome-wide data.

62       Next-generation sequencing (NGS) has now replaced conventional Sanger sequencing [24].  
63 Conventional Sanger sequencing can simultaneously analyze 8–96 sequencing reactions, whereas  
64 NGS can simultaneously run millions to billions of sequencing reactions in parallel. This technique  
65 can dramatically and quickly determine the gene sequences in organisms whose whole-genome  
66 sequences have already been determined. Even at the laboratory level, genomic sequencing results  
67 can be produced in only a few days, enabling researchers to obtain genome-wide information rapidly.  
68 Furthermore, RNA sequencing (RNA-Seq) has recently been developed to measure gene expression  
69 levels by counting the number of sequence reads obtained from converting RNA into cDNA [25].  
70 Existing RNA-Seq data analysis tools include RSeQC [26], which measures the quality control of the  
71 obtained data; Cufflinks [27], which involves genome mapping; and IsoEM [28], which identifies  
72 isoforms within a dataset. These tools can be used to identify gene expression variations from RNA-  
73 Seq data. TopGO (Alexa et al., 2006) is an analytical tool used to identify gene function based on  
74 RNA-Seq data and can confirm the functions of genes with varying expression levels. In addition,  
75 Cascade R was established to identify the gene cascade of a query gene [29]. Cascade R constructs  
76 an intergenic network of knockout genes from the results of DNA microarray analysis. However, it  
77 requires multiple timeline datasets from microarray analyses.

78 Genes, especially those expressed in early embryogenesis, function in chronological order  
79 rather than having only a single function, and genes responsible for functional expression often exert  
80 their effects at the bottom of gene cascades. STRING [30], BIOGRID [31], and WormBase [23] are  
81 databases of protein-protein interactions and the gene-dependent regulation of transcription and  
82 translation. In order to predict genetic cascades from these databases, researchers currently must  
83 perform separate analyses. Moreover, although RNA-Seq can be used to easily acquire large amounts  
84 of data via a semi-automatic process, the subsequent analysis must be performed manually and is  
85 therefore quite time-consuming. Therefore, the data acquisition capacity currently exceeds the data  
86 analysis capacity. Accordingly, automation of the analysis using bioinformatics tools is an important  
87 research subject.

88 In this study, we performed RNA-Seq analysis of the polarity mediator mutants *spn-4*, *mex-1*,  
89 and *mex-3* in *C. elegans*. Next, we developed a novel tool, Gene Cascade Finder (GCF), to extract  
90 genes with a high probability of being directly or indirectly regulated by these polarity mediators.  
91 Finally, the gene cascade and its validity were examined.

92

## 93 **Methods**

94

### 95 **Strains**

96 *C. elegans* N2, *mex-1* (or286), and *mex-3* (eu149) strains, and *Escherichia coli* OP50 strain were  
97 provided by the Caenorhabditis Genetics Center (<https://cgc.umn.edu/>), and the *C. elegans* *spn-4*  
98 (tm291) strain was provided by National BioResource Project [32].

99

### 100 **Culture of *C. elegans* and synchronization at the early embryo stage**

101 All strains except for *mex-1* (or286) were cultured on nematode growth medium agar coated with *E.*  
102 *coli* OP50 at 20°C. Because *mex-1* (or286) strain is a temperature-sensitive mutant strain, it was  
103 cultured at 15°C to strengthen its phenotype [13]. Furthermore, all strains were transferred to S-Basal  
104 solution inoculated with *E. coli* OP50 at 20°C for large culture. To obtain early embryos from the  
105 culture medium, when *C. elegans* adults had only 3–5 eggs, they were synchronized using an alkaline  
106 bleaching method, and the early embryos were recovered [33]. These *C. elegans* early embryos were  
107 used as the samples for RNA-Seq analysis.

108

### 109 **RNA-Seq analysis**

110 The mRNAs of the synchronized *C. elegans* early embryos were purified using RNeasy Minikit  
111 (Qiagen NV, Venlo, the Netherlands). Purified mRNAs were reverse-transcribed into cDNAs,  
112 amplified by polymerase chain reaction, and fragmented using a TruSeq RNA Sample Prep Kit  
113 (Illumina, Inc.). The amplified cDNAs were sequenced using Hi-Seq2000 (Illumina, Inc.) and the  
114 sequenced cDNAs were mapped to the *C. elegans* genome sequence and counted according to

115 WormBase (WS190) [23] using DNAnexus. Using this procedure, the mRNA expression levels were  
116 obtained as reads per kilobase of exon per million mapped reads (RPKM) [34]. The gene name and  
117 RPKM values of wild-type and mutant genes were filed for input data in GCF (S1 Table).

118

## 119 **Comparative quantitative gene expression analysis**

120 Expression levels of gene  $i$  in the wild-type and mutant were defined as  $x_i$  and  $y_i$ , respectively, and  
121 the change rates in these gene expression levels ( $R_i$ ) were determined as shown in Equation 1.  
122 Because the data obtained by RNA-Seq analysis had a non-normal distribution, the data were  
123 subjected to non-parametric tests using Equations 2a and 2b.

$$124 \quad R_i = y_i/x_i \quad (i = 1, \dots, N) \quad (1)$$

$$125 \quad R_i < M_i - Q_i, \quad M_i + Q_i < R_i \quad (2a)$$

$$126 \quad M_i - Q_i < R_i < M_i + Q_i \quad (2b)$$

127 Where  $N$  is the number of genes, and  $M_i$  and  $Q_i$  are the median and quartile deviation, respectively.  
128 Genes that satisfied the condition of Equation 2a were assumed to show expression level fluctuations,  
129 and genes satisfying the condition of Equation 2b were assumed to not show expression level  
130 fluctuations.

131

## 132 **Dataset for the software**

133 Information on the expression timing and interactions of all genes in *C. elegans* was extracted from  
134 WormBase (Version 256) [23] using the application programming interface. The total transcription  
135 factors of *C. elegans* were acquired from the gene ontology database Amigo 2  
136 (<http://amigo.geneontology.org/amigo>) [35] using the keyword search “GO: 0006351”. Furthermore,

137 all gene IDs, protein IDs, and domain information from Pfam (<https://pfam.xfam.org/>) [36] in *C.*  
138 *elegans* required for functional analysis were extracted from UniProt [37].

139

## 140 **Direct target prediction by GCF**

141 GCF was developed by the algorithm shown in Fig. 1. First, the candidate genes of the target of the  
142 query gene were found from transcription factors and genes with no gene expression level  
143 fluctuations, as calculated by Equation 2b, with the same cellular localization and phenotype. Query  
144 genes bind to target mRNAs to regulate their translation. Thus, the mRNA expression levels of the  
145 target genes showed no changes. In addition, the target genes needed to be expressed with the same  
146 timing as the query gene because the query gene is directly bound to the target mRNA. Furthermore,  
147 the gene cascade of the target genes was mostly consistent with the query gene cascade, suggesting  
148 that the target gene may have the same phenotype as the query gene. Therefore, to expand the gene  
149 cascade, the target gene should be a transcription factor with downstream genes.

150

## 151 **Downstream gene identification by GCF**

152 The search for downstream genes was carried out as follows. First, the genes from transcription or  
153 protein-protein interactions were extracted as downstream gene candidates of the target gene. Second,  
154 the expression timing of the candidate genes was checked. Only candidate genes noted as being  
155 expressed in early embryos or in embryos in WormBase were defined as downstream genes of the  
156 query's target genes. These first two steps were then repeated to obtain the next downstream genes.  
157 Finally, the procedure was repeated until there were no genes left to be extracted to obtain the final  
158 gene. Lastly, GCF output the cascade data (S2–S4 Tables). An example showing input obtained from  
159 output data from GCF to Cytoscape [38] is provided in Fig. 2.



160

## 161 **Specific domain search from the constructed gene cascade**

162 Each direct target gene was rooted, and the functions of their bottom genes were investigated using  
163 Pfam [36] in UniProt [37]. The P-values of the domains from the bottom gene products were  
164 evaluated using the same formula for Gene Ontology in Panther [39]. If the transcription-related  
165 domain was extracted from a cascade, the cascade was no longer considered since it would be  
166 functioning only after the early embryo stage.

167

## 168 **Results and Discussion**

169

### 170 **Development of Gene Cascade Finder**

171 The programming language Ruby was used to construct Gene Cascade Finder (GCF). The web  
172 interface of GCF was written in Python. The input data for GCF were data from the wild-type and  
173 mutant strains as shown in S1 Table. The output data from GCF were tables of discovered gene  
174 cascades (S2–S4 Tables), the data input into Cytoscape (S5 Table), and gene cascade-specific  
175 domains and their gene cascades (S6 Table). GCF is available at <http://www.gcf.sk.ritsumei.ac.jp>

176

### 177 **Analysis of mRNA expression by comparative RNA-Seq**

178 To explore polarity mediator-dependent mechanisms, the effects of deficiencies in polarity mediators  
179 were analyzed by performing RNA-Seq analysis in early embryos. From the results of comparative  
180 RNA-Seq of the wild-type strain and the *spn-4*, *mex-1*, and *mex-3* mutant strains, 15,288, 15,265, and  
181 15,005 genes were identified, respectively (S7 Table). In these gene groups, expression level  
182 fluctuations were calculated by examining the median  $\pm$  quartile deviations. From this analysis, 6,417  
183 genes distributed at  $-0.65 < \log_2(\text{RNA expression level ratio}) < 0.69$  in the *spn-4* gene, 6,456 genes  
184 distributed at  $-0.74 < \log_2(\text{RNA expression level ratio}) < 0.82$  in the *mex-3* gene, and 6,491 genes  
185 distributed at  $-0.82 < \log_2(\text{RNA expression level ratio}) < 1.10$  in the *mex-1* gene were defined as  
186 genes showing no expression level variations (S8 Table).

187

## 188 **Gene cascade prediction using Gene Cascade Finder**

189 As shown in S1 Table, gene cascade prediction was performed by inputting data obtained by  
190 comparative RNA-Seq into GCF. GCF can predict gene cascades by continuously integrating the  
191 results from RNA-Seq along with data on gene expression and intermolecular interactions from  
192 WormBase. In total, 127, 180, and 226 gene cascades were predicted from 6,418, 6,457, and 8,513  
193 genes from the comparative analysis of the *spn-4*, *mex-1*, and *mex-3* mutant strains, respectively (Fig.  
194 3 and S6–S8 Tables).

195

196

## 197 **Extraction of gene cascade-specific domains using Gene Cascade** 198 **Finder**

199 The genes and domains located at the bottom of the gene cascade were extracted for functional  
200 analysis of the predicted gene cascade (S9–S11 Tables). Overall, 53, 146, and 143 genes with 32, 34,  
201 and 54 specific domains as the bottom gene were extracted from the gene cascades in the *spn-4*, *mex-*  
202 *1*, and *mex-3* mutants, respectively.

203

## 204 **Domain analysis of *spn-4*, *mex-1*, and *mex-3* cascades**

205 To predict the functions of the gene cascades, we focused on the functions of genes localized at the  
206 bottom of the gene cascade by analyzing the domains of the gene products using the Pfam protein  
207 family database. The functions of the 53 SPN-4-mediated genes were obtained as bottom genes to  
208 calculate the functional trends in the *spn-4* cascade. Within the 53 bottom genes, 32 domains were  
209 classified based on information from the Pfam database (Table 1) (Bateman et al., 2004). When we

210 calculated the numbers of these genes, transcription and signal transduction were obtained at high  
211 frequency.

212 Similarly, in the gene cascade of 146 *mex-1*-mediated genes, 27 domains were classified and  
213 obtained from the domain analyses to have functions in early embryonic development, cell division,  
214 transcription, DNA replication, and signal transduction (Table 1). In contrast, in the gene cascades of  
215 the 143 *mex-3*-mediated genes, 54 domains were classified and obtained from the domain analyses to  
216 have functions in development, cell cycle, transcription, and signal transduction (Table 1).

217

## 218 **Evaluation of GCF by assessment of gene cascades in the canonical** 219 **Wnt signaling pathway**

220 Next, we focused on genes involved in SPN-4-mediated signal transduction (Fig. 4A). First, we  
221 found that MOM-2, a nematode homolog of the Wnt ligand, is involved in the signal transduction  
222 cascade (Table 1). Since both SPN-4 and MOM-2 were previously reported to regulate EMS cell  
223 lineage formation and spindle orientation [11, 40], we hypothesized that the SPN-4/MOM-2 gene  
224 cascade may have an essential role in early embryogenesis and may regulate the Wnt signaling  
225 pathway. Moreover, because OMA-1, MEX-1, and PIE-1, which are known to be essential for  
226 MOM-2 expression in embryonic development [40], were also identified in this pathway, the GCF-  
227 mediated gene cascade prediction was assumed to be accurate.

228 Similarly, *unc-37*, which encodes a Groucho/TLE homolog that suppresses Wnt signaling,  
229 was found as the “bottom gene” in the *spn-4* and *mex-3* cascades (Fig. 4A, B). Thus, we propose that  
230 GCF-mediated gene cascade prediction may be useful for identification of gene cascades involved in  
231 *C. elegans* embryonic development.

232

233 **Examples of the application of GCF for prediction of new biological**  
234 **functions involved in a gene cascade**

235

236 **Endoplasmic reticulum (ER) stress response pathway in a MEX-1-mediated gene**  
237 **cascade**

238 Because cell division and DNA replication are regulated by a MEX-1-dependent cascade, we further  
239 focused on this signal transduction cascade. In the gene cascade related to signal transduction, *paqr-2*,  
240 which encodes an adiponectin receptor, was isolated (Fig. 4C). Interestingly, a stress response  
241 pathway is known to regulate stress responses in both mouse and *C. elegans* embryogenesis [40, 41].  
242 Thus, an evolutionarily conserved gene cascade against environmental stress may be identified using  
243 GCF. Moreover, because adiponectin receptor regulates insulin signaling [42], it is likely that MEX-  
244 1/PAQR-2-mediated gene cascades may be involved in ER stress tolerance signaling within or  
245 parallel to the insulin signaling pathway during embryogenesis.

246

247 ***lin-35*, *hsp-3*, and *gpa-12* in a MEX-1/DPY-23-mediated gene cascade in neuronal**  
248 **development**

249 In a MEX-1/DPY-23-mediated gene cascade, the *mex-1*, *lin-14*, *let-60*, *ces-2*, *unc-13*, and *dpy-23*  
250 mutants were shown to exhibit specific phenotypes in neuronal development (Fig. 4D) [12, 43-45].  
251 Thus, six of the nine genes of this gene cascade were shown to have essential roles in neuronal  
252 development, indicating that MEX-1/DPY-23-mediated gene cascades may regulate neuronal  
253 function. Although their roles in neuronal development have not yet been investigated, locomotion  
254 defects have been reported in *hsp-3* and *gpa-12* mutants [46, 47]. Similarly, the *lin-35* (n745)  
255 mutation has been shown to enhance the neuronal phenotype of the neuronal regulator genes *dpy-13*

256 and *unc-104* [48]. Thus, *lin-35*, *hsp-3*, and *gpa-12* may be involved in a DPY-23-mediated gene  
257 cascade in neuronal development in embryos [45]. However, further studies are required to examine  
258 this possibility.

259

## 260 **MEX-3/APL-1-mediated neuronal patterning and MEX-3/CDC-14-mediated cell** 261 **fate determination in the MEX-3-mediated gene cascade**

262 Because MEX-3 is specifically expressed in AB cells at the four-cell stage, spatiotemporal-regulated  
263 synaptic formation defects in *hbl-1* mutants and *apl-1*-dependent embryonic neuronal patterning may  
264 be elucidated by identifying MEX-3/APL-1-mediated gene cascades (Fig. 4E) [49-51]. In parallel,  
265 when we focused on the MEX-3/CDC-14-mediated gene cascade (Fig. 4E), CDC-14B, a zebrafish  
266 homolog of CDC-14, was shown to be involved in formation of the cilium in sensory neurons [50].  
267 Because sensory neurons have cilia in *C. elegans* [52], CDC-14 may be involved in an evolutionarily  
268 conserved signaling pathway. Similarly, the *lin-35* (n745) mutation was shown to enhance the  
269 neuronal phenotype of neuronal regulator genes [48]. Thus, *lin-35* may be involved in a MEX-  
270 3/CDC-14-mediated gene cascade in sensory neuron development. Accordingly, our findings  
271 suggested that GCF may be useful for predicting the comprehensive functions of query genes and for  
272 identification of new genes involved in known gene cascades.

273

## 274 **Conclusion**

275 In this study, we created a software program called GCF, which could comprehensively identify  
276 genes downstream of the query genes by integrating RNA-Seq data and previously characterized data  
277 from WormBase. Using GCF, we analyzed gene cascades of the polarity mediator proteins SPN-4,  
278 MEX-1, and MEX-3, and identified 127, 180, and 226 putative gene cascades, respectively. By

279 analyzing the functions of these gene cascades, we confirmed that SPN-4 and MEX-3 regulate the  
280 canonical Wnt pathway during embryonic development. Furthermore, we found that the ER stress  
281 response and motor neuron development are regulated by MEX-1-dependent cascades, and that  
282 neural development is regulated by MEX-3-dependent cascades. Although we used GCF only to  
283 evaluate SPN-4, MEX-1, and MEX-3 functions in this study, the method is applicable for other  
284 translation or transcription factors involved in early embryogenesis. In addition, GCF provides a  
285 general method for predicting the functions of genes involved in a gene cascade during *C. elegans*  
286 embryonic development. Taken together, we propose that our strategy using the GCF tool offers a  
287 reliable approach for comprehensively identifying networks of embryo-specific gene cascades in *C.*  
288 *elegans*. Importantly, GCF can also be applied to humans and other model organisms such as mice  
289 and *Drosophila*.

290 In the future, by expanding the algorithm to fit the cell lineage-segregation of *C. elegans* [3],  
291 we will be able to predict the precise gene cascades reflecting four-dimensional (spatial and temporal)  
292 regulation [53]. Combinational analysis of GCF and molecular biology techniques such as RNA-pull  
293 down assays, fluorescent *in situ* hybridization, and phenotypic characterization of the mutants may be  
294 required to build a more reliable regulatory network for these gene cascades [54, 55].

295

## 296 **Acknowledgements**

297 We would like to thank Dr. Hisao Kojima, Mr. Takahiro Nakamura, and Mr. Yuuto Ohnishi for their  
298 support and helpful comments, and Mr. Marori Yoshioka and Dr. Takuya Takahashi for fruitful  
299 discussions.

300



## 301 **References**

302

- 303 1. English J, Pearson G, Wilsbacher J, Swantek J, Karandikar M, Xu S, et al. New insights into  
304 the control of MAP kinase pathways. *Experimental cell research*. 1999;253(1):255-70. Epub  
305 1999/12/02. doi: 10.1006/excr.1999.4687. PubMed PMID: 10579927.
- 306 2. Maduro MF, Rothman JH. Making worm guts: the gene regulatory network of the  
307 *Caenorhabditis elegans* endoderm. *Developmental biology*. 2002;246(1):68-85. Epub  
308 2002/05/25. doi: 10.1006/dbio.2002.0655. PubMed PMID: 12027435.
- 309 3. Sulston JE, Schierenberg E, White JG, Thomson JN. The embryonic cell lineage of the  
310 nematode *Caenorhabditis elegans*. *Developmental biology*. 1983;100(1):64-119. Epub  
311 1983/11/01. PubMed PMID: 6684600.
- 312 4. Lai CH, Chou CY, Ch'ang LY, Liu CS, Lin W. Identification of novel human genes  
313 evolutionarily conserved in *Caenorhabditis elegans* by comparative proteomics. *Genome*  
314 *research*. 2000;10(5):703-13. Epub 2000/05/16. PubMed PMID: 10810093; PubMed Central  
315 PMCID: PMCPMC310876.
- 316 5. Schubert CM, Lin R, de Vries CJ, Plasterk RH, Priess JR. MEX-5 and MEX-6 function to  
317 establish soma/germline asymmetry in early *C. elegans* embryos. *Molecular cell*.  
318 2000;5(4):671-82. Epub 2000/07/06. PubMed PMID: 10882103.
- 319 6. Fraser AG, Kamath RS, Zipperlen P, Martinez-Campos M, Sohrmann M, Ahringer J.  
320 Functional genomic analysis of *C. elegans* chromosome I by systematic RNA interference.  
321 *Nature*. 2000;408(6810):325-30. Epub 2000/12/01. doi: 10.1038/35042517. PubMed PMID:  
322 11099033.

- 323 7. Mello CC, Draper BW, Krause M, Weintraub H, Priess JR. The pie-1 and mex-1 genes and  
324 maternal control of blastomere identity in early *C. elegans* embryos. *Cell*. 1992;70(1):163-76.  
325 Epub 1992/07/10. PubMed PMID: 1623520.
- 326 8. Ogura K, Kishimoto N, Mitani S, Gengyo-Ando K, Kohara Y. Translational control of  
327 maternal glp-1 mRNA by POS-1 and its interacting protein SPN-4 in *Caenorhabditis elegans*.  
328 *Development (Cambridge, England)*. 2003;130(11):2495-503. Epub 2003/04/19. PubMed  
329 PMID: 12702662.
- 330 9. Tsuboi D, Qadota H, Kasuya K, Amano M, Kaibuchi K. Isolation of the interacting molecules  
331 with GEX-3 by a novel functional screening. *Biochemical and biophysical research  
332 communications*. 2002;292(3):697-701. Epub 2002/04/02. doi: 10.1006/bbrc.2002.6717.  
333 PubMed PMID: 11922622.
- 334 10. Dorfman M, Gomes JE, O'Rourke S, Bowerman B. Using RNA interference to identify  
335 specific modifiers of a temperature-sensitive, embryonic-lethal mutation in the  
336 *Caenorhabditis elegans* ubiquitin-like Nedd8 protein modification pathway E1-activating  
337 gene *rfl-1*. *Genetics*. 2009;182(4):1035-49. Epub 2009/06/17. doi:  
338 10.1534/genetics.109.104885. PubMed PMID: 19528325; PubMed Central PMCID:  
339 PMCPMC2728846.
- 340 11. Gomes JE, Encalada SE, Swan KA, Shelton CA, Carter JC, Bowerman B. The maternal gene  
341 *spn-4* encodes a predicted RRM protein required for mitotic spindle orientation and cell fate  
342 patterning in early *C. elegans* embryos. *Development (Cambridge, England)*.  
343 2001;128(21):4301-14. Epub 2001/10/31. PubMed PMID: 11684665.
- 344 12. Hallam SJ, Goncharov A, McEwen J, Baran R, Jin Y. SYD-1, a presynaptic protein with  
345 PDZ, C2 and rhoGAP-like domains, specifies axon identity in *C. elegans*. *Nature*

- 346 neuroscience. 2002;5(11):1137-46. Epub 2002/10/16. doi: 10.1038/nn959. PubMed PMID:  
347 12379863.
- 348 13. Guedes S, Priess JR. The *C. elegans* MEX-1 protein is present in germline blastomeres and is  
349 a P granule component. *Development (Cambridge, England)*. 1997;124(3):731-9. Epub  
350 1997/02/01. PubMed PMID: 9043088.
- 351 14. Huang NN, Mootz DE, Walhout AJ, Vidal M, Hunter CP. MEX-3 interacting proteins link  
352 cell polarity to asymmetric gene expression in *Caenorhabditis elegans*. *Development*  
353 (Cambridge, England). 2002;129(3):747-59. Epub 2002/02/07. PubMed PMID: 11830574.
- 354 15. Pagano JM, Farley BM, McCoig LM, Ryder SP. Molecular basis of RNA recognition by the  
355 embryonic polarity determinant MEX-5. *The Journal of biological chemistry*.  
356 2007;282(12):8883-94. Epub 2007/02/01. doi: 10.1074/jbc.M700079200. PubMed PMID:  
357 17264081.
- 358 16. Sonnichsen B, Koski LB, Walsh A, Marschall P, Neumann B, Brehm M, et al. Full-genome  
359 RNAi profiling of early embryogenesis in *Caenorhabditis elegans*. *Nature*.  
360 2005;434(7032):462-9. Epub 2005/03/26. doi: 10.1038/nature03353. PubMed PMID:  
361 15791247.
- 362 17. Consortium. CeS. Genome sequence of the nematode *C. elegans*: a platform for investigating  
363 biology. *Science (New York, NY)*. 1998;282(5396):2012-8. Epub 1998/12/16. PubMed  
364 PMID: 9851916.
- 365 18. Bumgarner R. Overview of DNA microarrays: types, applications, and their future. *Current*  
366 *protocols in molecular biology*. 2013;Chapter 22:Unit 22.1. Epub 2013/01/05. doi:  
367 10.1002/0471142727.mb2201s101. PubMed PMID: 23288464; PubMed Central PMCID:  
368 PMCPMC4011503.

- 369 19. Han X, Aslanian A, Yates JR, 3rd. Mass spectrometry for proteomics. *Current opinion in*  
370 *chemical biology*. 2008;12(5):483-90. Epub 2008/08/23. doi: 10.1016/j.cbpa.2008.07.024.  
371 PubMed PMID: 18718552; PubMed Central PMCID: PMCPMC2642903.
- 372 20. Agrawal N, Dasaradhi PV, Mohammed A, Malhotra P, Bhatnagar RK, Mukherjee SK. RNA  
373 interference: biology, mechanism, and applications. *Microbiology and molecular biology*  
374 *reviews : MMBR*. 2003;67(4):657-85. Epub 2003/12/11. PubMed PMID: 14665679; PubMed  
375 Central PMCID: PMCPMC309050.
- 376 21. Bazan J, Calkosinski I, Gamian A. Phage display--a powerful technique for immunotherapy:  
377 1. Introduction and potential of therapeutic applications. *Human vaccines &*  
378 *immunotherapeutics*. 2012;8(12):1817-28. Epub 2012/08/22. doi: 10.4161/hv.21703. PubMed  
379 PMID: 22906939; PubMed Central PMCID: PMCPMC3656071.
- 380 22. Bruckner A, Polge C, Lentze N, Auerbach D, Schlattner U. Yeast two-hybrid, a powerful tool  
381 for systems biology. *International journal of molecular sciences*. 2009;10(6):2763-88. Epub  
382 2009/07/08. doi: 10.3390/ijms10062763. PubMed PMID: 19582228; PubMed Central  
383 PMCID: PMCPMC2705515.
- 384 23. Stein L, Sternberg P, Durbin R, Thierry-Mieg J, Spieth J. WormBase: network access to the  
385 genome and biology of *Caenorhabditis elegans*. *Nucleic acids research*. 2001;29(1):82-6.  
386 Epub 2000/01/11. PubMed PMID: 11125056; PubMed Central PMCID: PMCPMC29781.
- 387 24. Besser J, Carleton HA, Gerner-Smidt P, Lindsey RL, Trees E. Next-generation sequencing  
388 technologies and their application to the study and control of bacterial infections. *Clinical*  
389 *microbiology and infection : the official publication of the European Society of Clinical*  
390 *Microbiology and Infectious Diseases*. 2018;24(4):335-41. Epub 2017/10/28. doi:  
391 10.1016/j.cmi.2017.10.013. PubMed PMID: 29074157; PubMed Central PMCID:  
392 PMCPMC5857210.

- 393 25. Wang Z, Gerstein M, Snyder M. RNA-Seq: a revolutionary tool for transcriptomics. Nature  
394 reviews Genetics. 2009;10(1):57-63. Epub 2008/11/19. doi: 10.1038/nrg2484. PubMed  
395 PMID: 19015660; PubMed Central PMCID: PMCPMC2949280.
- 396 26. Wang L, Wang S, Li W. RSeQC: quality control of RNA-seq experiments. Bioinformatics  
397 (Oxford, England). 2012;28(16):2184-5. Epub 2012/06/30. doi:  
398 10.1093/bioinformatics/bts356. PubMed PMID: 22743226.
- 399 27. Trapnell C, Roberts A, Goff L, Pertea G, Kim D, Kelley DR, et al. Differential gene and  
400 transcript expression analysis of RNA-seq experiments with TopHat and Cufflinks. Nature  
401 protocols. 2012;7(3):562-78. Epub 2012/03/03. doi: 10.1038/nprot.2012.016. PubMed PMID:  
402 22383036; PubMed Central PMCID: PMCPMC3334321.
- 403 28. Nicolae M, Mangul S, Mandoiu, II, Zelikovsky A. Estimation of alternative splicing isoform  
404 frequencies from RNA-Seq data. Algorithms for molecular biology : AMB. 2011;6(1):9.  
405 Epub 2011/04/21. doi: 10.1186/1748-7188-6-9. PubMed PMID: 21504602; PubMed Central  
406 PMCID: PMCPMC3107792.
- 407 29. Jung N, Bertrand F, Bahram S, Vallat L, Maumy-Bertrand M. Cascade: a R package to study,  
408 predict and simulate the diffusion of a signal through a temporal gene network.  
409 Bioinformatics (Oxford, England). 2014;30(4):571-3. Epub 2013/12/07. doi:  
410 10.1093/bioinformatics/btt705. PubMed PMID: 24307703.
- 411 30. Szklarczyk D, Franceschini A, Wyder S, Forslund K, Heller D, Huerta-Cepas J, et al.  
412 STRING v10: protein-protein interaction networks, integrated over the tree of life. Nucleic  
413 acids research. 2015;43(Database issue):D447-52. Epub 2014/10/30. doi:  
414 10.1093/nar/gku1003. PubMed PMID: 25352553; PubMed Central PMCID:  
415 PMCPMC4383874.

- 416 31. Stark C, Breitkreutz BJ, Reguly T, Boucher L, Breitkreutz A, Tyers M. BioGRID: a general  
417 repository for interaction datasets. *Nucleic acids research*. 2006;34(Database issue):D535-9.  
418 Epub 2005/12/31. doi: 10.1093/nar/gkj109. PubMed PMID: 16381927; PubMed Central  
419 PMCID: PMCPMC1347471.
- 420 32. Mitani S. Nematode, an experimental animal in the national BioResource project.  
421 *Experimental animals*. 2009;58(4):351-6. Epub 2009/08/06. PubMed PMID: 19654432.
- 422 33. Motohashi T, Tabara H, Kohara Y. Protocols for large scale in situ hybridization on *C.*  
423 *elegans* larvae. *WormBook : the online review of C elegans biology*. 2006:1-8. Epub  
424 2007/12/01. doi: 10.1895/wormbook.1.103.1. PubMed PMID: 18050447; PubMed Central  
425 PMCID: PMCPMC4781301.
- 426 34. Mortazavi A, Williams BA, McCue K, Schaeffer L, Wold B. Mapping and quantifying  
427 mammalian transcriptomes by RNA-Seq. *Nature methods*. 2008;5(7):621-8. Epub  
428 2008/06/03. doi: 10.1038/nmeth.1226. PubMed PMID: 18516045.
- 429 35. Consortium GO. Gene Ontology Consortium: going forward. *Nucleic acids research*.  
430 2015;43(Database issue):D1049-56. Epub 2014/11/28. doi: 10.1093/nar/gku1179. PubMed  
431 PMID: 25428369; PubMed Central PMCID: PMCPMC4383973.
- 432 36. Bateman A, Coin L, Durbin R, Finn RD, Hollich V, Griffiths-Jones S, et al. The Pfam protein  
433 families database. *Nucleic acids research*. 2004;32(Database issue):D138-41. Epub  
434 2003/12/19. doi: 10.1093/nar/gkh121. PubMed PMID: 14681378; PubMed Central PMCID:  
435 PMCPMC308855.
- 436 37. Apweiler R, Bairoch A, Wu CH, Barker WC, Boeckmann B, Ferro S, et al. UniProt: the  
437 Universal Protein knowledgebase. *Nucleic acids research*. 2004;32(Database issue):D115-9.  
438 Epub 2003/12/19. doi: 10.1093/nar/gkh131. PubMed PMID: 14681372; PubMed Central  
439 PMCID: PMCPMC308865.

- 440 38. Shannon P, Markiel A, Ozier O, Baliga NS, Wang JT, Ramage D, et al. Cytoscape: a software  
441 environment for integrated models of biomolecular interaction networks. *Genome research*.  
442 2003;13(11):2498-504. Epub 2003/11/05. doi: 10.1101/gr.1239303. PubMed PMID:  
443 14597658; PubMed Central PMCID: PMCPMC403769.
- 444 39. Mi H, Muruganujan A, Thomas PD. PANTHER in 2013: modeling the evolution of gene  
445 function, and other gene attributes, in the context of phylogenetic trees. *Nucleic acids*  
446 *research*. 2013;41(Database issue):D377-86. Epub 2012/11/30. doi: 10.1093/nar/gks1118.  
447 PubMed PMID: 23193289; PubMed Central PMCID: PMCPMC3531194.
- 448 40. Thorpe CJ, Schlesinger A, Carter JC, Bowerman B. Wnt signaling polarizes an early *C.*  
449 *elegans* blastomere to distinguish endoderm from mesoderm. *Cell*. 1997;90(4):695-705. Epub  
450 1997/08/22. PubMed PMID: 9288749.
- 451 41. Abraham T, Pin CL, Watson AJ. Embryo collection induces transient activation of XBP1 arm  
452 of the ER stress response while embryo vitrification does not. *Molecular human reproduction*.  
453 2012;18(5):229-42. Epub 2011/12/14. doi: 10.1093/molehr/gar076. PubMed PMID:  
454 22155729.
- 455 42. Kyriakakis E, Charmpilas N, Tavernarakis N. Differential adiponectin signalling couples ER  
456 stress with lipid metabolism to modulate ageing in *C. elegans*. *Scientific reports*.  
457 2017;7(1):5115. Epub 2017/07/13. doi: 10.1038/s41598-017-05276-2. PubMed PMID:  
458 28698593; PubMed Central PMCID: PMCPMC5505976.
- 459 43. Desai C, Horvitz HR. *Caenorhabditis elegans* mutants defective in the functioning of the  
460 motor neurons responsible for egg laying. *Genetics*. 1989;121(4):703-21. Epub 1989/04/01.  
461 PubMed PMID: 2721931; PubMed Central PMCID: PMCPMC1203655.
- 462 44. Kohn RE, Duerr JS, McManus JR, Duke A, Rakow TL, Maruyama H, et al. Expression of  
463 multiple UNC-13 proteins in the *Caenorhabditis elegans* nervous system. *Molecular biology*

- 464 of the cell. 2000;11(10):3441-52. Epub 2000/10/12. doi: 10.1091/mbc.11.10.3441. PubMed  
465 PMID: 11029047; PubMed Central PMCID: PMCPMC15005.
- 466 45. Pan CL, Baum PD, Gu M, Jorgensen EM, Clark SG, Garriga G. C. elegans AP-2 and  
467 retromer control Wnt signaling by regulating mig-14/Wntless. Developmental cell.  
468 2008;14(1):132-9. Epub 2007/12/28. doi: 10.1016/j.devcel.2007.12.001. PubMed PMID:  
469 18160346; PubMed Central PMCID: PMCPMC2709403.
- 470 46. Gottschalk A, Almedom RB, Schedletzky T, Anderson SD, Yates JR, 3rd, Schafer WR.  
471 Identification and characterization of novel nicotinic receptor-associated proteins in  
472 Caenorhabditis elegans. The EMBO journal. 2005;24(14):2566-78. Epub 2005/07/02. doi:  
473 10.1038/sj.emboj.7600741. PubMed PMID: 15990870; PubMed Central PMCID:  
474 PMCPMC1176467.
- 475 47. Yau DM, Yokoyama N, Goshima Y, Siddiqui ZK, Siddiqui SS, Kozasa T. Identification and  
476 molecular characterization of the G alpha12-Rho guanine nucleotide exchange factor pathway  
477 in Caenorhabditis elegans. Proceedings of the National Academy of Sciences of the United  
478 States of America. 2003;100(25):14748-53. Epub 2003/12/06. doi:  
479 10.1073/pnas.2533143100. PubMed PMID: 14657363; PubMed Central PMCID:  
480 PMCPMC299794.
- 481 48. Lehner B, Calixto A, Crombie C, Tischler J, Fortunato A, Chalfie M, et al. Loss of LIN-35,  
482 the Caenorhabditis elegans ortholog of the tumor suppressor p105Rb, results in enhanced  
483 RNA interference. Genome biology. 2006;7(1):R4. Epub 2006/03/02. doi: 10.1186/gb-2006-  
484 7-1-r4. PubMed PMID: 16507136; PubMed Central PMCID: PMCPMC1431716.
- 485 49. Bowerman B, Ingram MK, Hunter CP. The maternal par genes and the segregation of cell fate  
486 specification activities in early Caenorhabditis elegans embryos. Development (Cambridge,  
487 England). 1997;124(19):3815-26. Epub 1997/11/21. PubMed PMID: 9367437.



- 488 50. Clement A, Solnica-Krezel L, Gould KL. Functional redundancy between Cdc14  
489 phosphatases in zebrafish ciliogenesis. *Developmental dynamics : an official publication of*  
490 *the American Association of Anatomists.* 2012;241(12):1911-21. Epub 2012/10/03. doi:  
491 10.1002/dvdy.23876. PubMed PMID: 23027426; PubMed Central PMCID:  
492 PMC3508521.
- 493 51. Hornsten A, Lieberthal J, Fadia S, Malins R, Ha L, Xu X, et al. APL-1, a *Caenorhabditis*  
494 *elegans* protein related to the human beta-amyloid precursor protein, is essential for viability.  
495 *Proceedings of the National Academy of Sciences of the United States of America.*  
496 2007;104(6):1971-6. Epub 2007/02/03. doi: 10.1073/pnas.0603997104. PubMed PMID:  
497 17267616; PubMed Central PMCID: PMC1794273.
- 498 52. Bae YK, Barr MM. Sensory roles of neuronal cilia: cilia development, morphogenesis, and  
499 function in *C. elegans*. *Frontiers in bioscience : a journal and virtual library.* 2008;13:5959-  
500 74. Epub 2008/05/30. PubMed PMID: 18508635; PubMed Central PMCID:  
501 PMC3124812.
- 502 53. Hunter CP, Kenyon C. Spatial and temporal controls target pal-1 blastomere-specification  
503 activity to a single blastomere lineage in *C. elegans* embryos. *Cell.* 1996;87(2):217-26. Epub  
504 1996/10/18. PubMed PMID: 8861906.
- 505 54. Iioka H, Macara IG. Detection of RNA-Protein Interactions Using Tethered RNA Affinity  
506 Capture. *Methods in molecular biology (Clifton, NJ).* 2015;1316:67-73. Epub 2015/05/15.  
507 doi: 10.1007/978-1-4939-2730-2\_6. PubMed PMID: 25967053; PubMed Central PMCID:  
508 PMC6047865.
- 509 55. Langer-Safer PR, Levine M, Ward DC. Immunological method for mapping genes on  
510 *Drosophila* polytene chromosomes. *Proceedings of the National Academy of Sciences of the*

511 United States of America. 1982;79(14):4381-5. Epub 1982/07/01. PubMed PMID: 6812046;  
512 PubMed Central PMCID: PMC346675.

513

514

515 **Table 1.** Scores of the functional characterization of *spn-1*-, *mex-1*-, and *mex-3*-mediated gene  
516 cascades by domain analysis.

517

|                     | <i>spn-4</i> | <i>mex-1</i> | <i>mex-3</i> |
|---------------------|--------------|--------------|--------------|
| Transcription       | 25           | 6            | 4            |
| Signal transduction | 5            | 3            | 12           |
| Development         | -            | 2            | 7            |
| Cell cycle          | -            | 3            | 5            |
| Cell division       | -            | -            | -            |
| DNA replication     | -            | 2            | 3            |
| Transport           | -            | 3            | -            |
| Others              | 2            | 12           | 18           |
| Unknown             | -            | 3            | 4            |

518

519 Properties of the gene product of the bottom genes were calculated by domain analysis. The sum of  
520 the characteristic features of each cascade ( $P < 0.05$ ) was then calculated. Domains with a score less  
521 than 1 were classified as “Others”.

522

## 523 **Figure legends**

524 **Fig. 1.** Schematic for prediction of the gene cascade. Application protocol for GCF. Genes in the  
525 predicted cascade are indicated by red frames. To identify the entire gene network, we repeatedly  
526 identified the downstream genes. The genes surrounded by black frames were required to identify the  
527 genes surrounded by red frames. The information of the labels with asterisks was extracted from  
528 WormBase.

529

530 **Fig. 2.** Representative example of the graphic output from GCF. Graphical examples from the GCF  
531 software were further processed using Cytoscape, allowing for identification of an output without  
532 adding a new input.

533

534 **Fig. 3.** Schematic illustrations of polarity mediator-dependent gene cascades during *C. elegans*  
535 embryogenesis. Rendering of each gene cascade was performed using Cytoscape. Nodes indicate  
536 each gene in the cascade. Edges indicate the interactions between two genes. Large and intermediate  
537 nodes indicate the query genes and the direct target of the query genes, respectively. Other nodes  
538 indicate downstream genes. Green nodes indicate genes that are expressed during the early  
539 embryonic stage. Purple nodes indicate presumptive early embryonic genes. Red, blue, and black  
540 edges indicate positive regulation, negative regulation, and genetic interactions, respectively. Dotted  
541 lines indicate protein-protein interactions. (A) *spn-4*-mediated gene cascade. (B) *mex-1*-mediated  
542 gene cascade. (C) *mex-3*-mediated gene cascade.

543

544 **Fig. 4.** Typical examples of SPN-4, MEX-1, and MEX-3-dependent gene cascades. (A) SPN-4-  
545 mediated gene cascade regulates Wnt signaling. (B) MEX-3-mediated gene cascade negatively  
546 regulates Wnt signaling. (C) MEX-1-mediated gene cascade regulates endoplasmic reticulum-

547 associated degradation (ERAD) of folding-deficient proteins. (D) MEX-1-mediated gene cascade  
548 regulates neuronal development. (E) MEX-3-mediated gene cascade regulates neuronal development.  
549

Figure 1

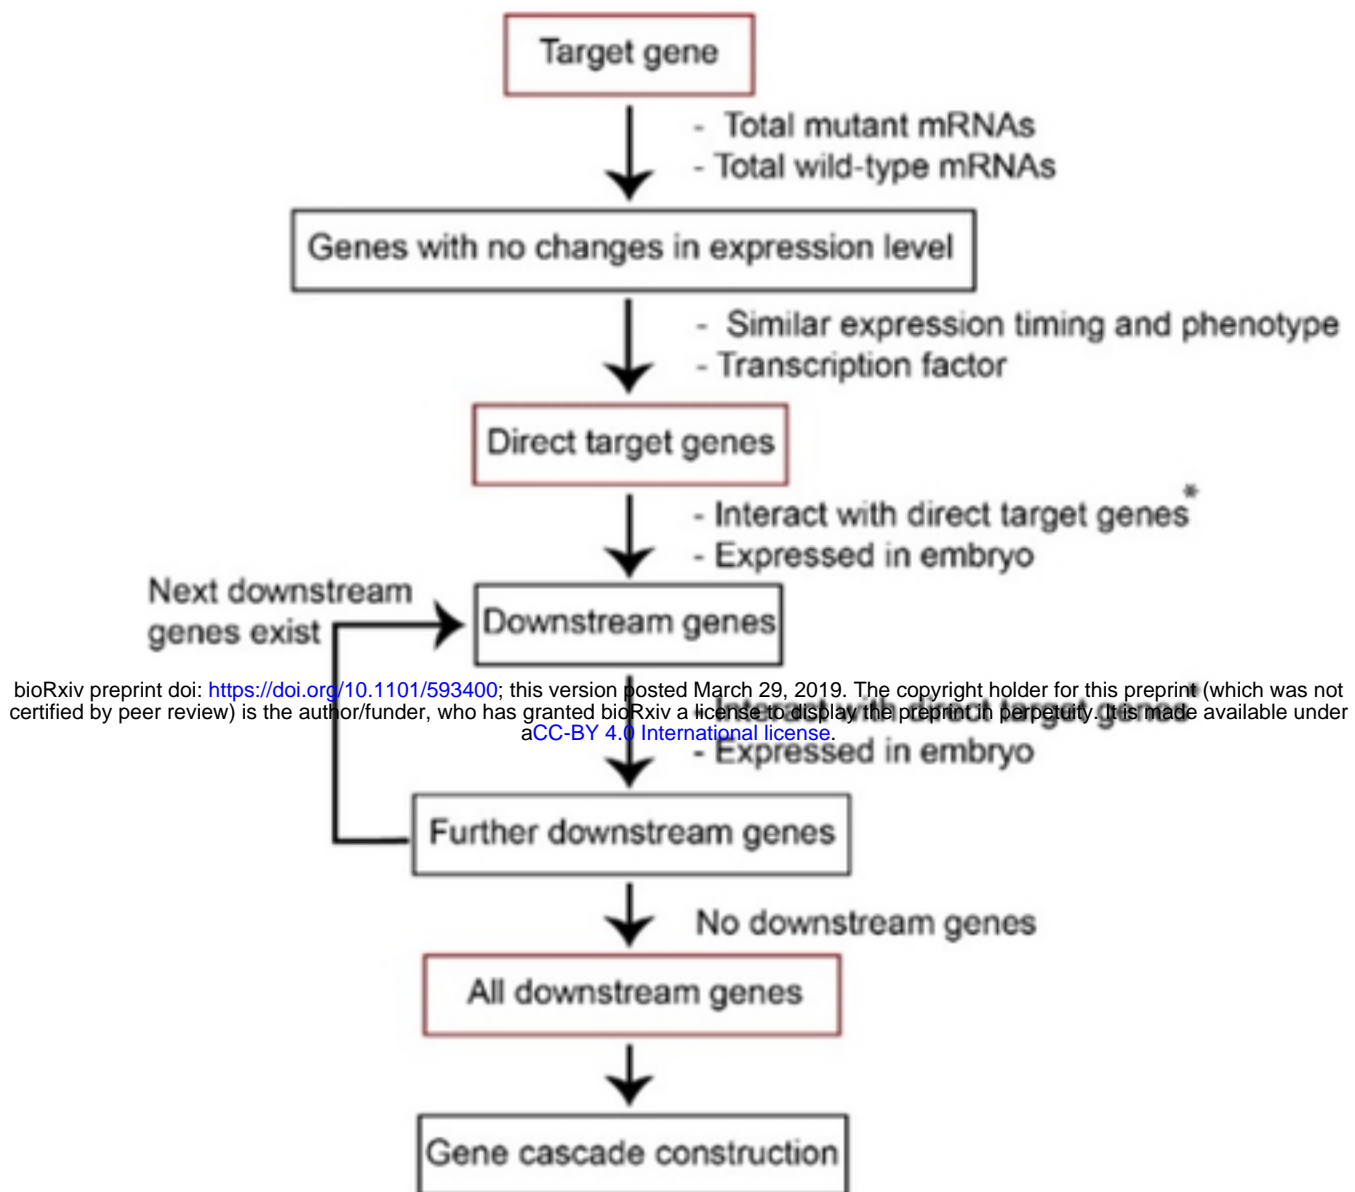

Figure 2

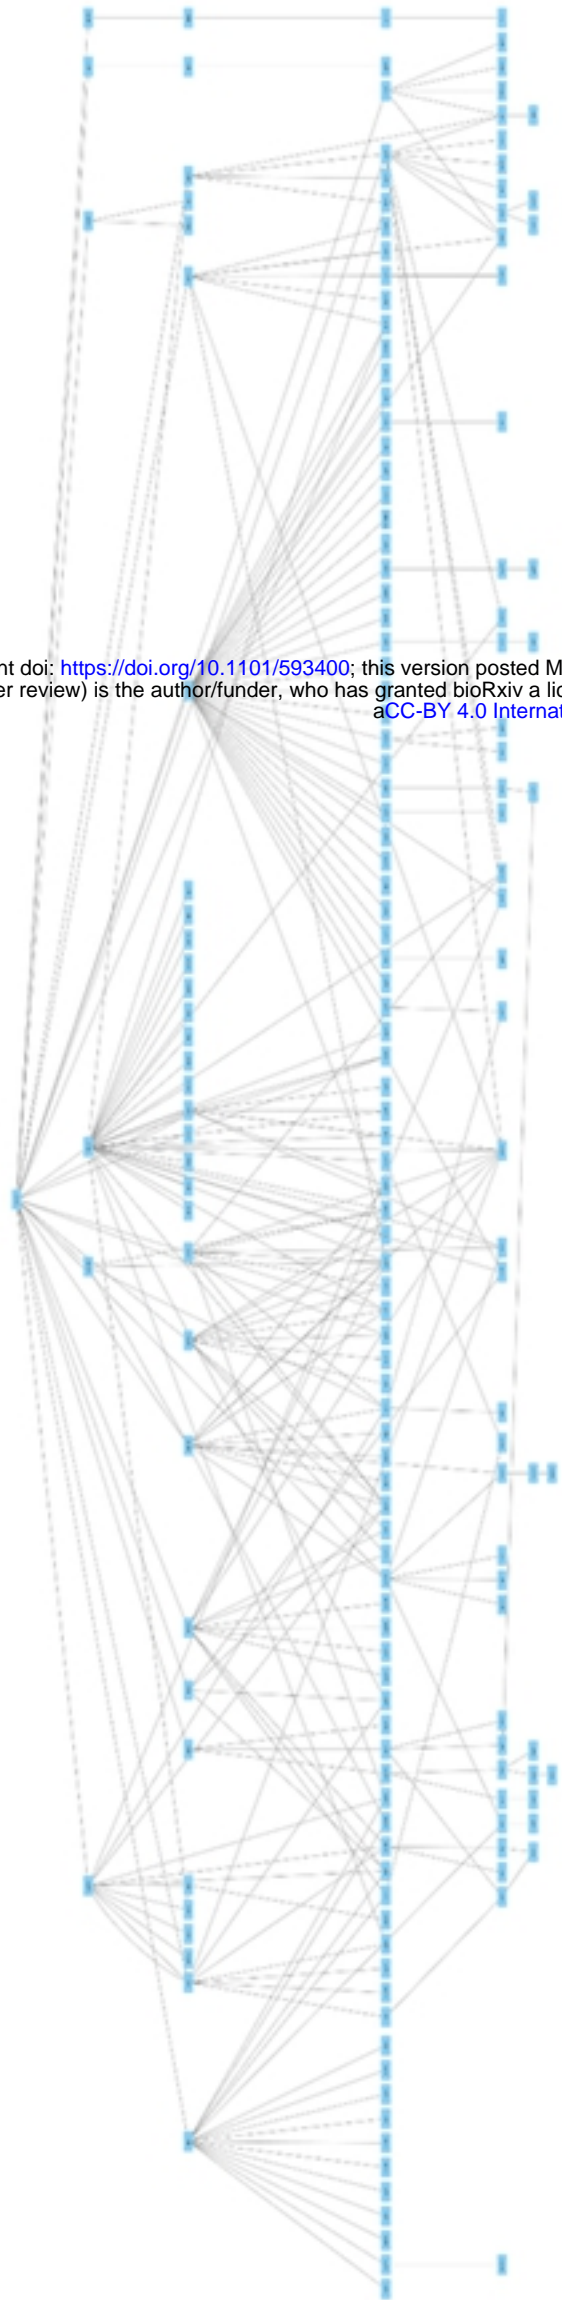

bioRxiv preprint doi: <https://doi.org/10.1101/593400>; this version posted March 29, 2019. The copyright holder for this preprint (which was not certified by peer review) is the author/funder, who has granted bioRxiv a license to display the preprint in perpetuity. It is made available under aCC-BY 4.0 International license.



Figure 3

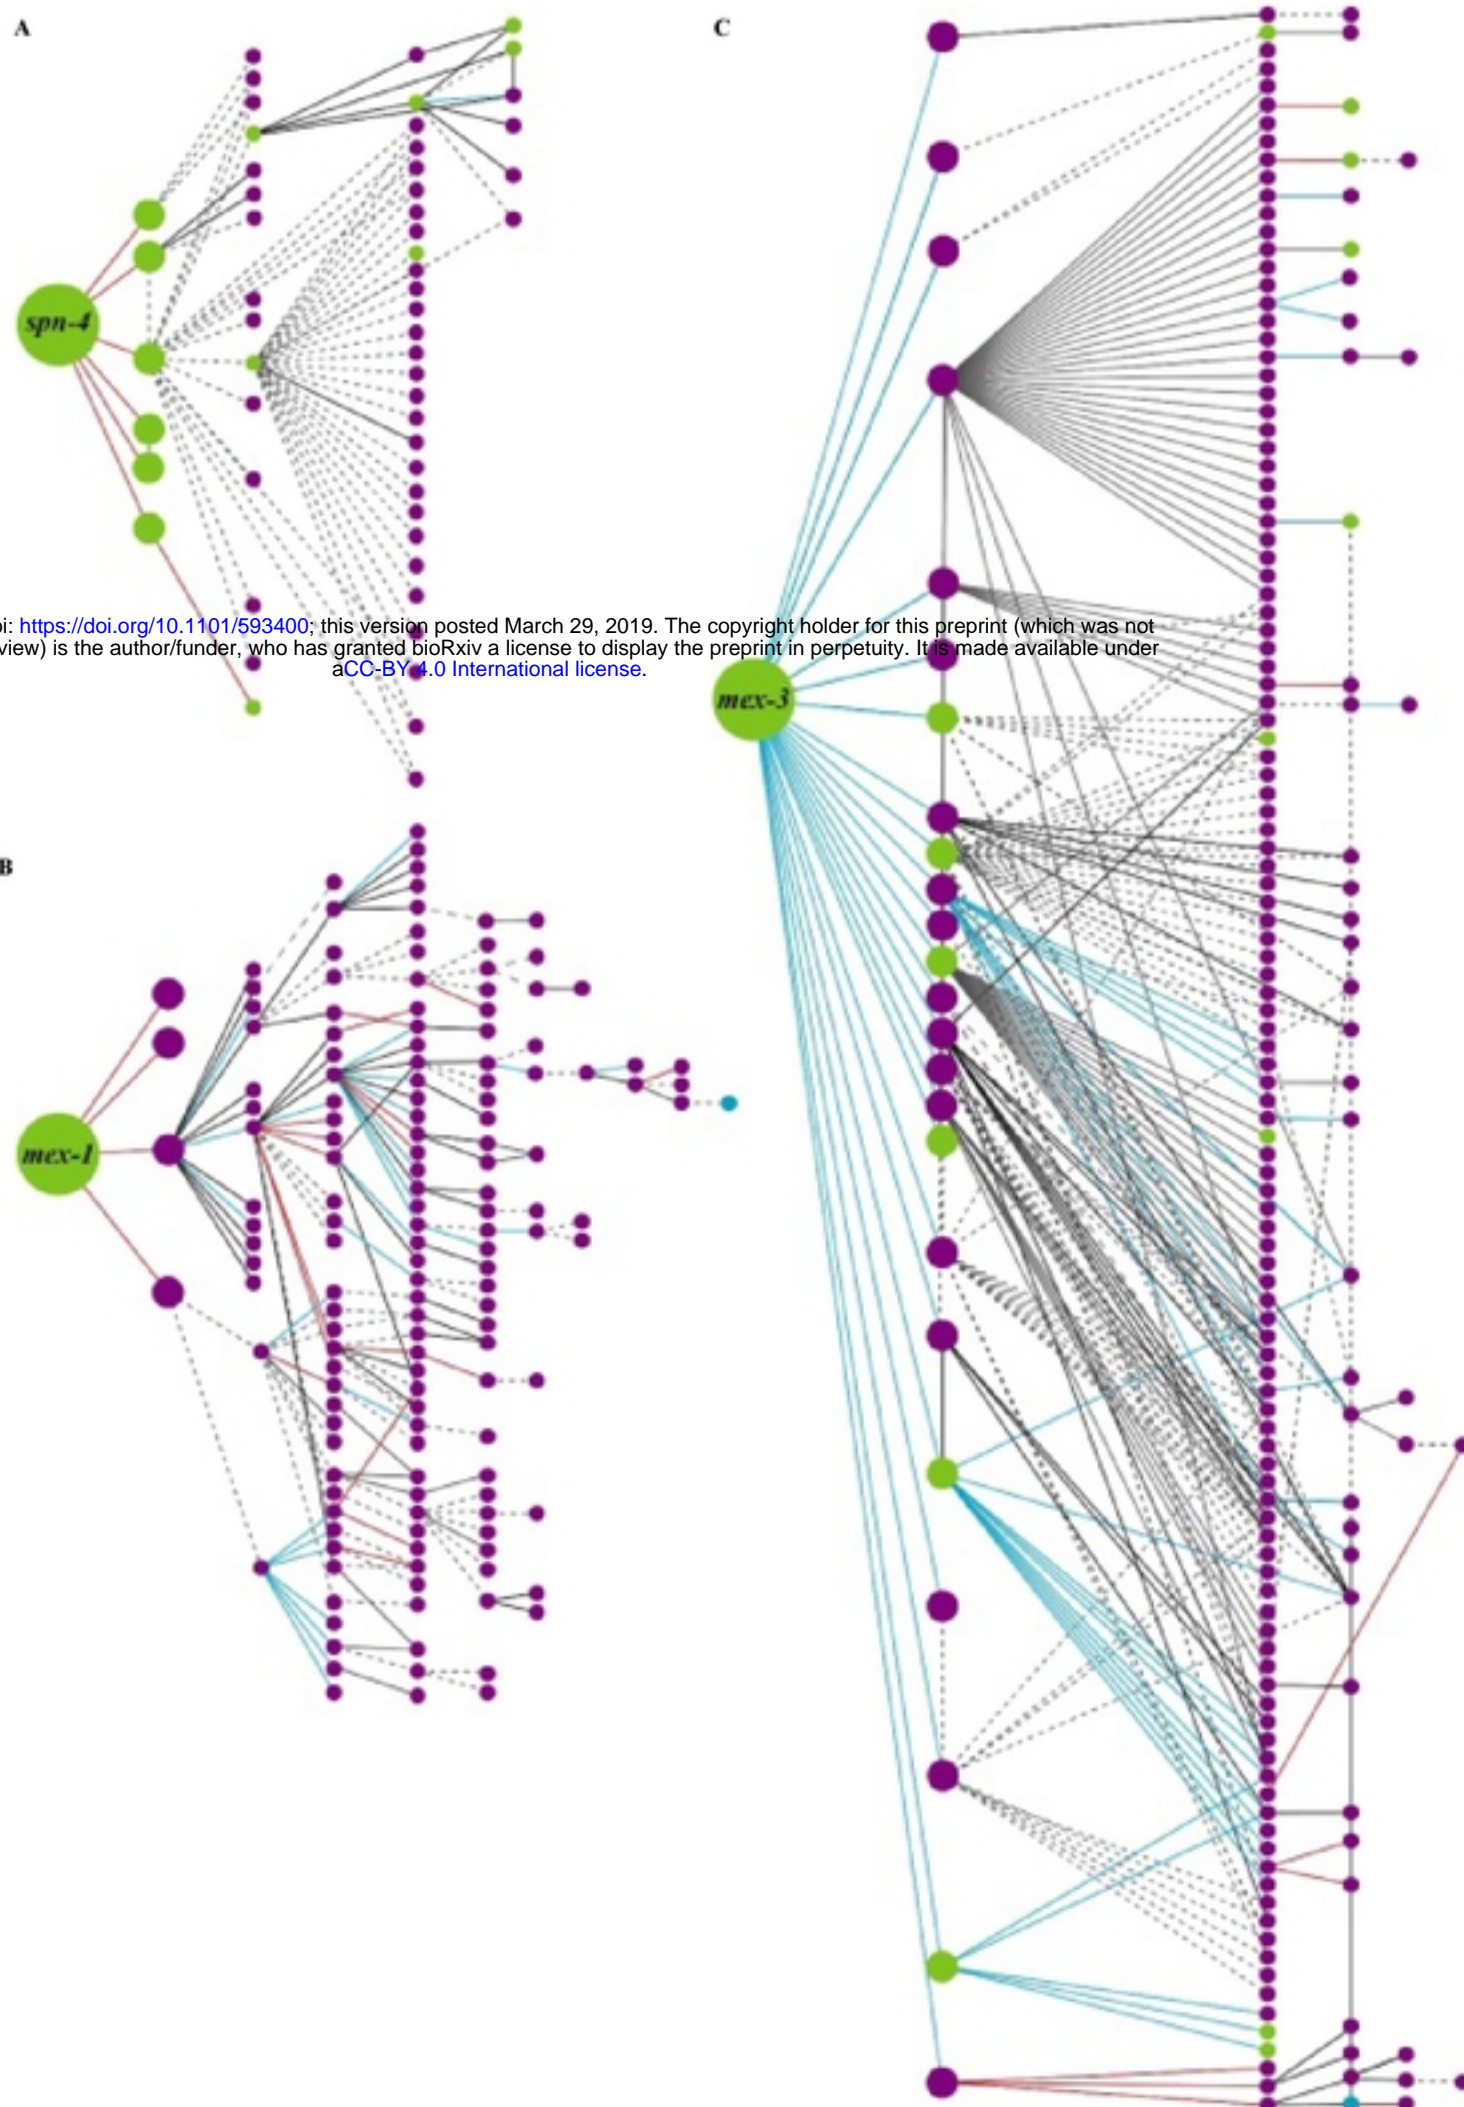



Figure 4

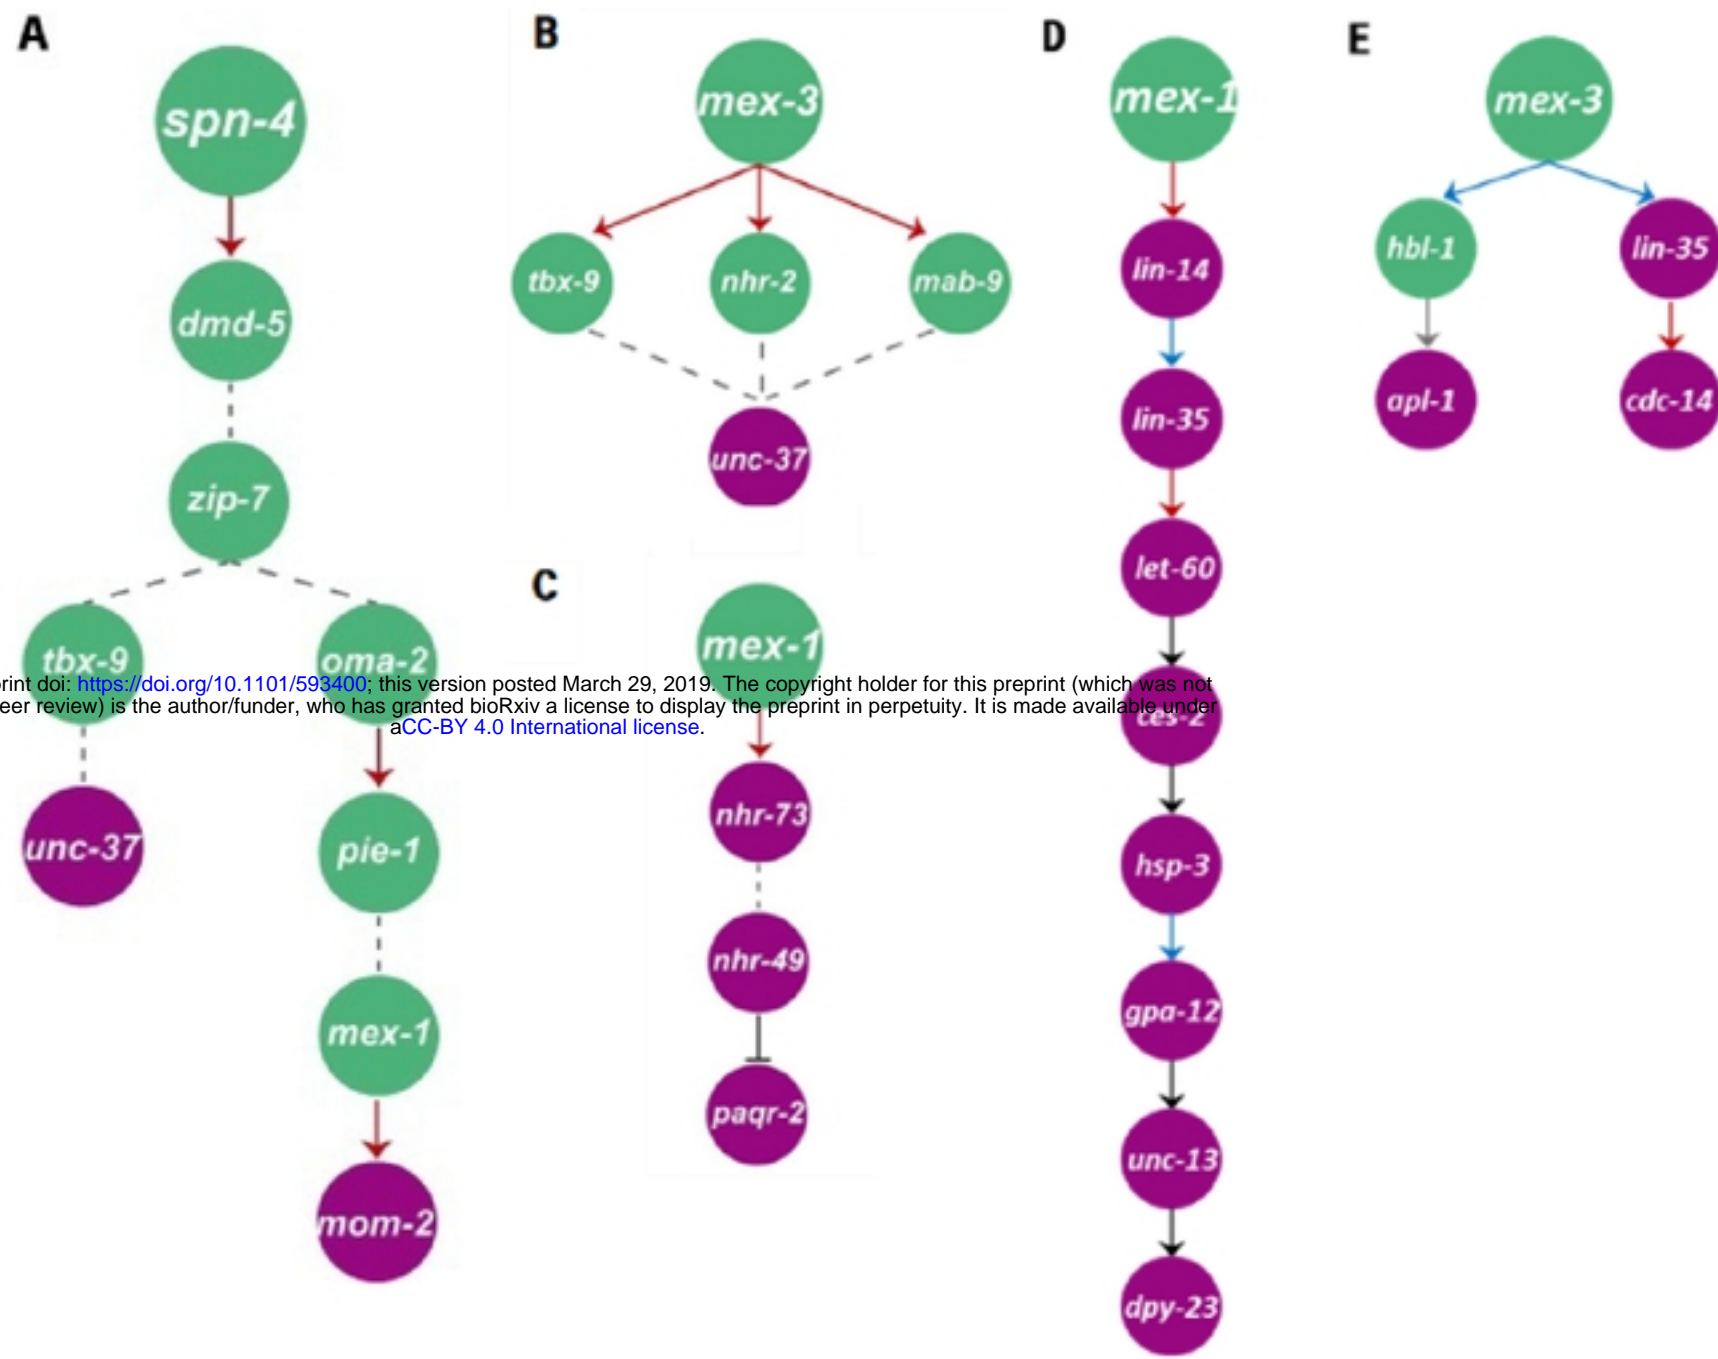

bioRxiv preprint doi: <https://doi.org/10.1101/593400>; this version posted March 29, 2019. The copyright holder for this preprint (which was not certified by peer review) is the author/funder, who has granted bioRxiv a license to display the preprint in perpetuity. It is made available under aCC-BY 4.0 International license.
